# Supplementary material for: Ageing, functioning patterns and their environmental determinants in the spinal cord injury (SCI) population: A comparative analysis across eleven European countries implementing the International Spinal Cord Injury Community Survey
Source: PubMed Central journal article supplement (PMC10118153; doi:10.1371/journal.pone.0284420), 2023-04-20

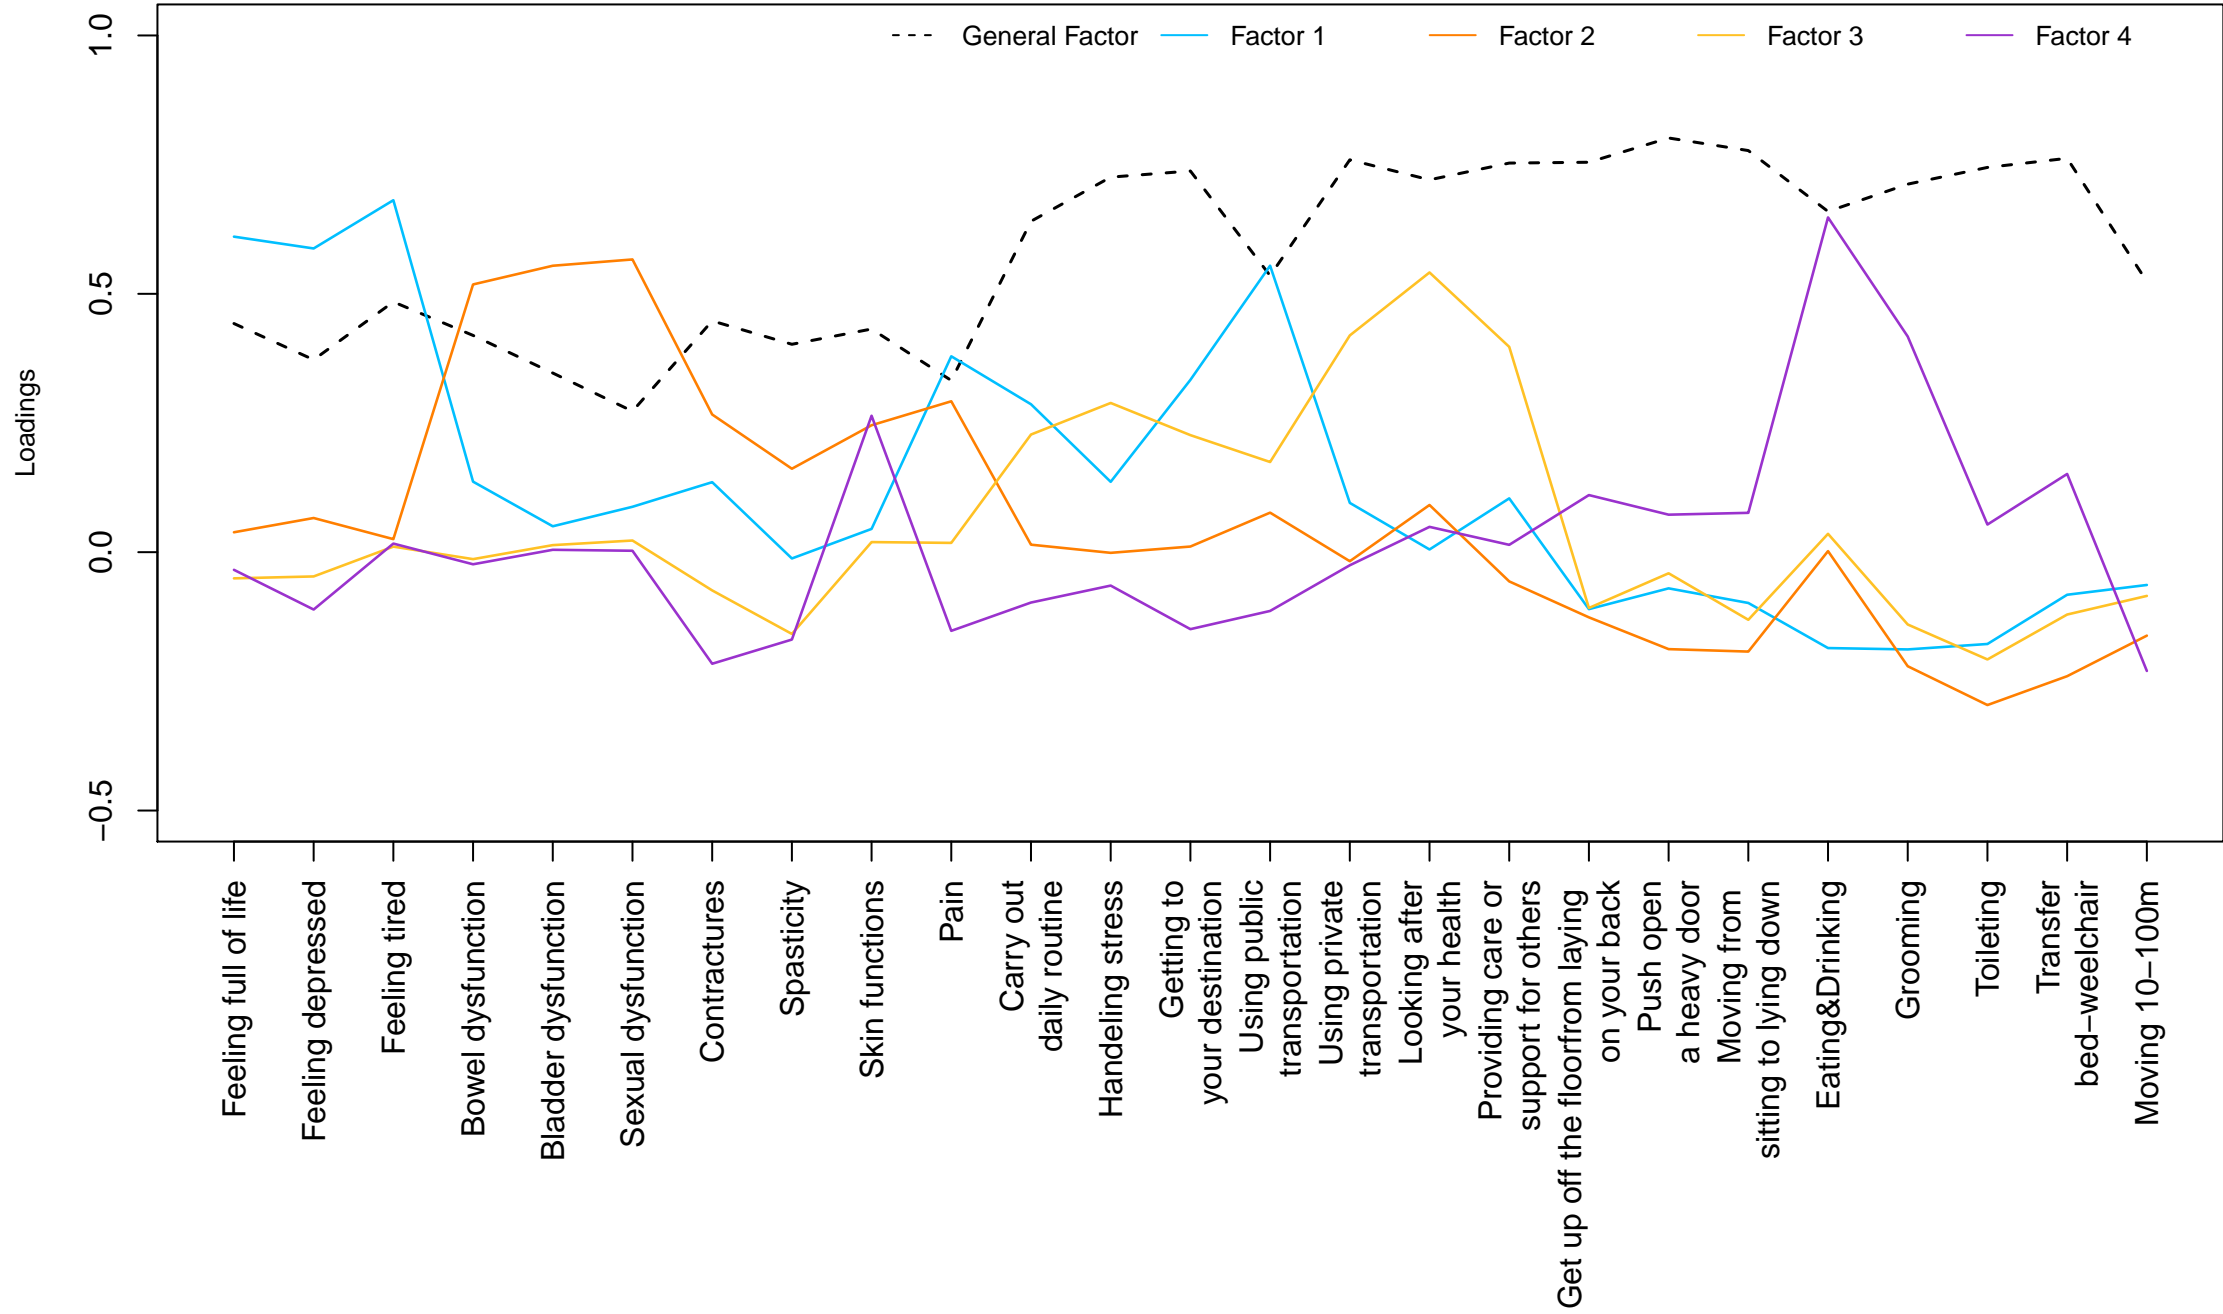

Supplement: pone.0284420.s001.pdf [file pone.0284420.s001.pdf]
