# Supplementary material for: Ageing, functioning patterns and their environmental determinants in the spinal cord injury (SCI) population: A comparative analysis across eleven European countries implementing the International Spinal Cord Injury Community Survey
Source: PubMed Central journal article supplement (PMC10118153; doi:10.1371/journal.pone.0284420), 2023-04-20

**Germany (N=1265), R2=44.69%**

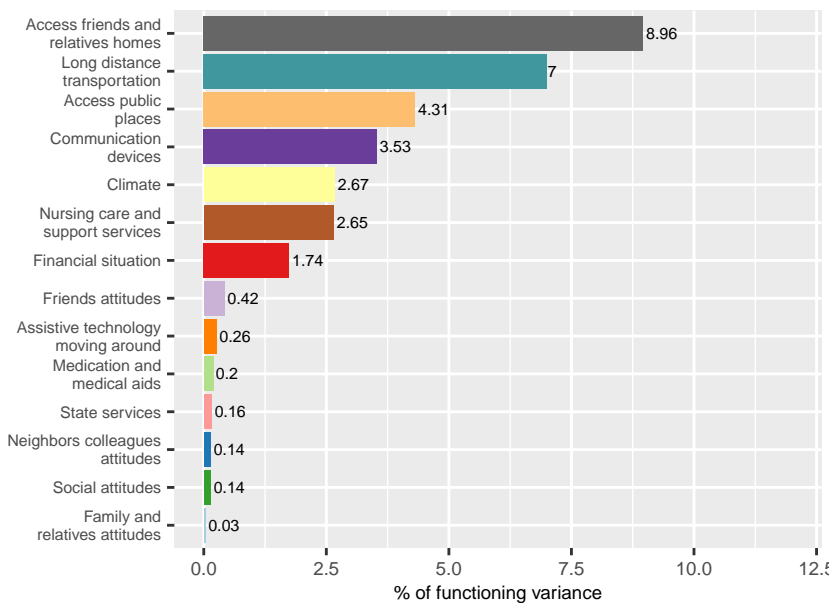

**Switzerland (N=1346), R2=44.71%**

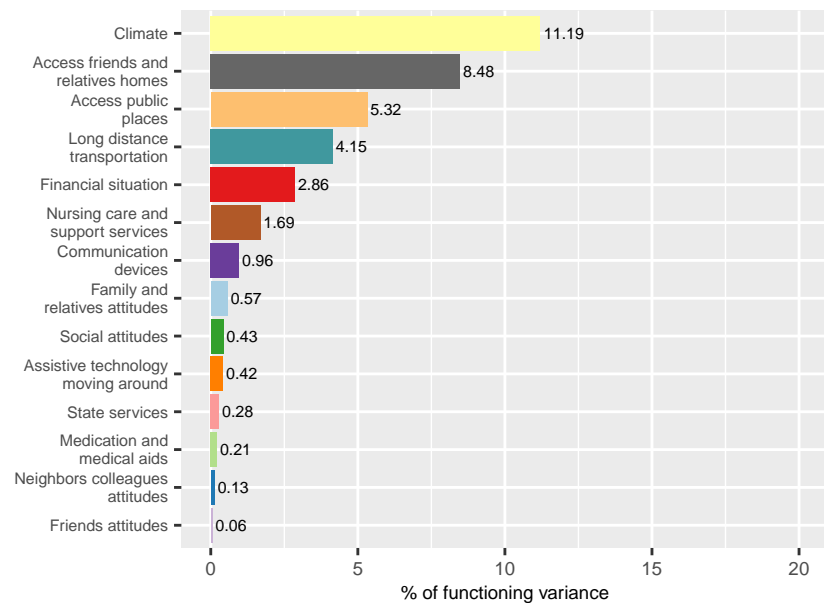

**Poland (N=880), R2=44.69%**

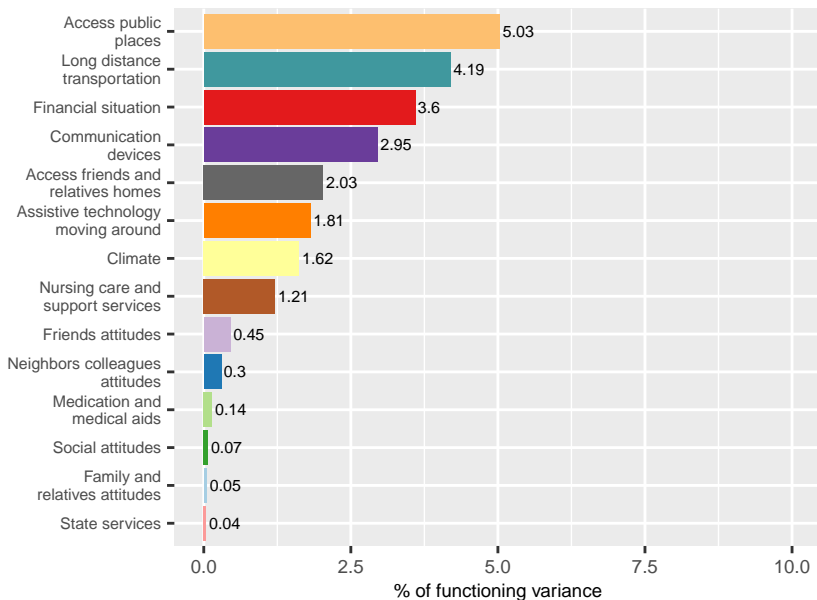

**The Netherlands (N=242), R2=54.42%**

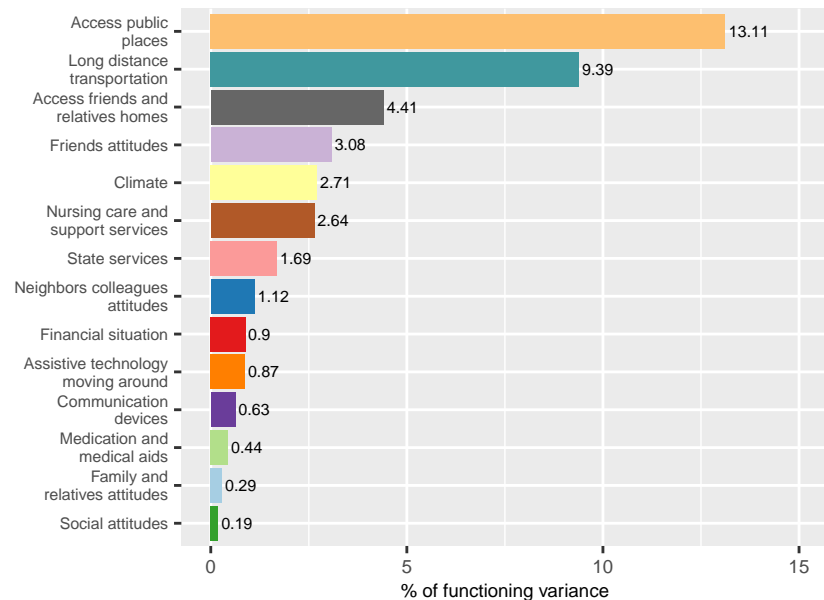

**Norway (N=541), R2=53.88%**

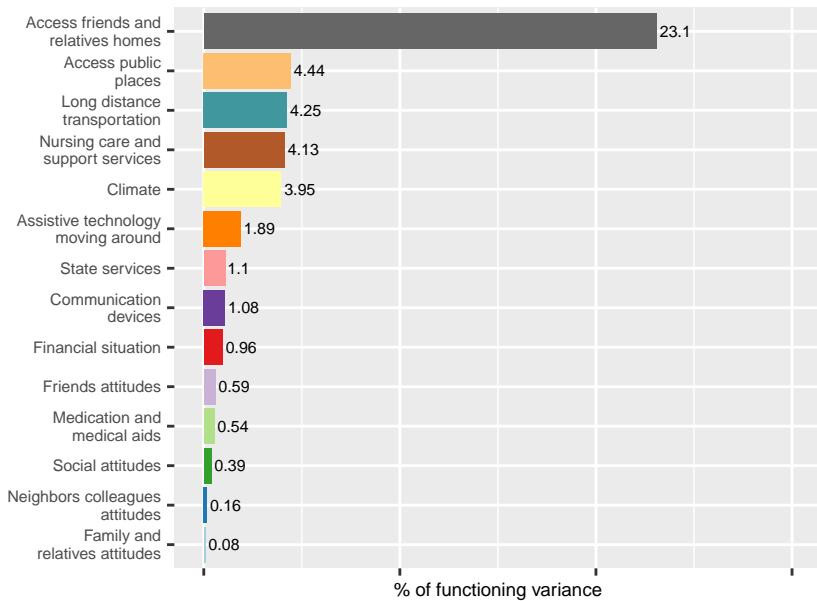

Supplement: pone.0284420.s002.pdf [file pone.0284420.s002.pdf]
