# Supplementary material for: Ageing, functioning patterns and their environmental determinants in the spinal cord injury (SCI) population: A comparative analysis across eleven European countries implementing the International Spinal Cord Injury Community Survey
Source: PubMed Central journal article supplement (PMC10118153; doi:10.1371/journal.pone.0284420), 2023-04-20

**Spain (N=350), R2=40.41%**

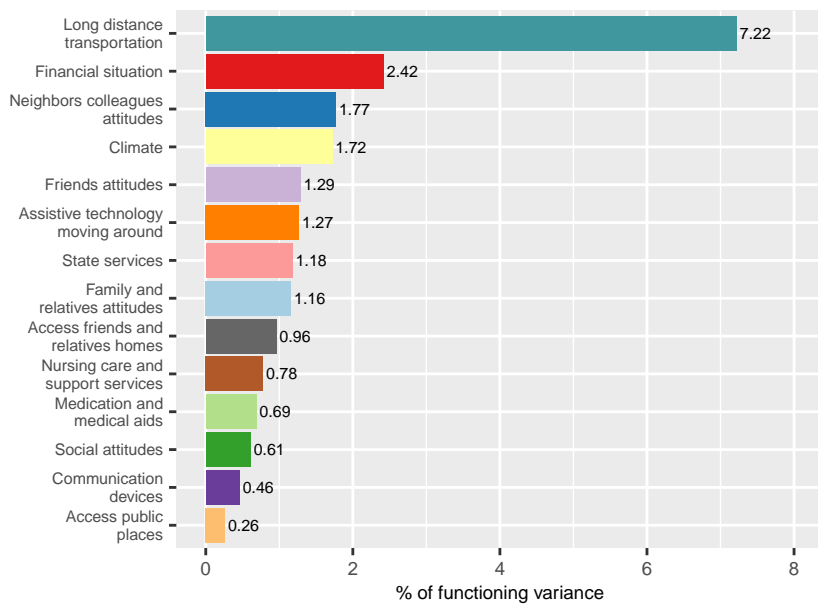

**France (N=350), R2=47.08%**

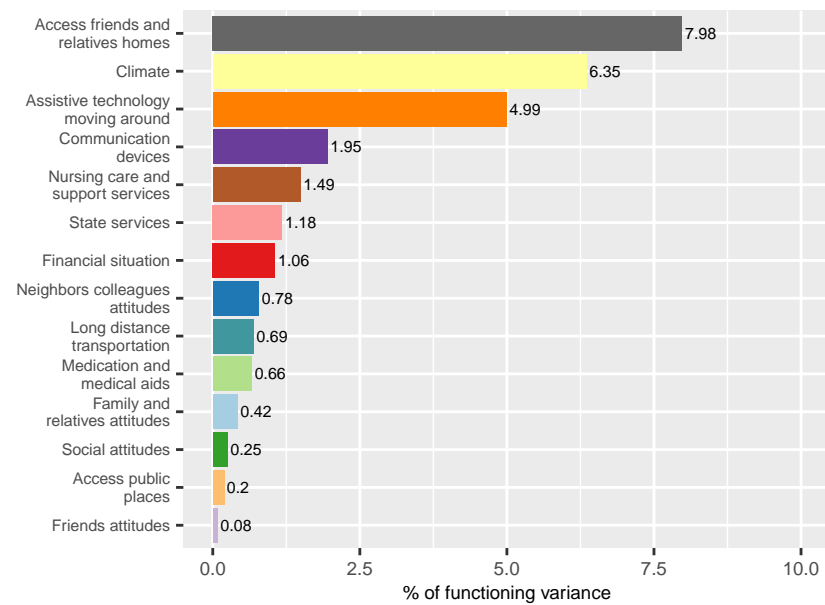

**Lithuania (N=212), R2=75.5%**

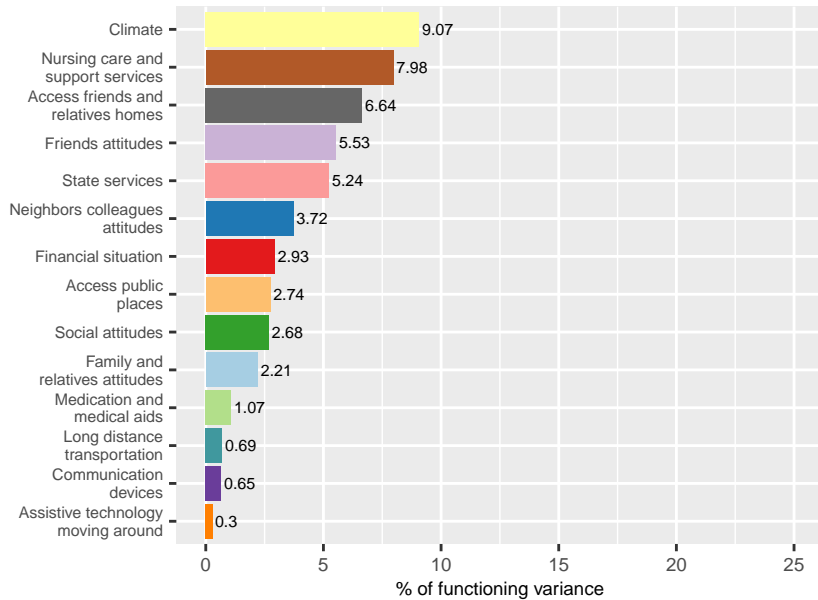

**Romania (N=201), R2=55%**

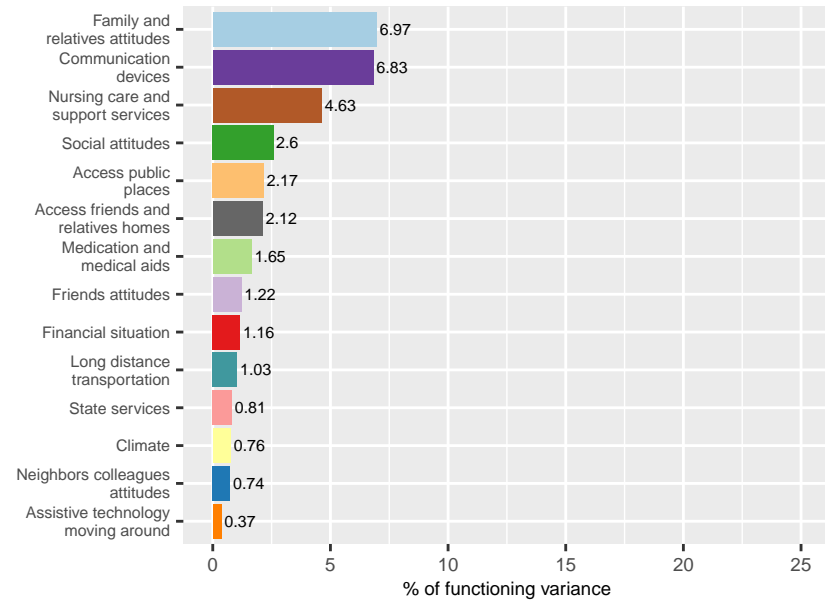

**Italy (N=186), R2=69.99%**

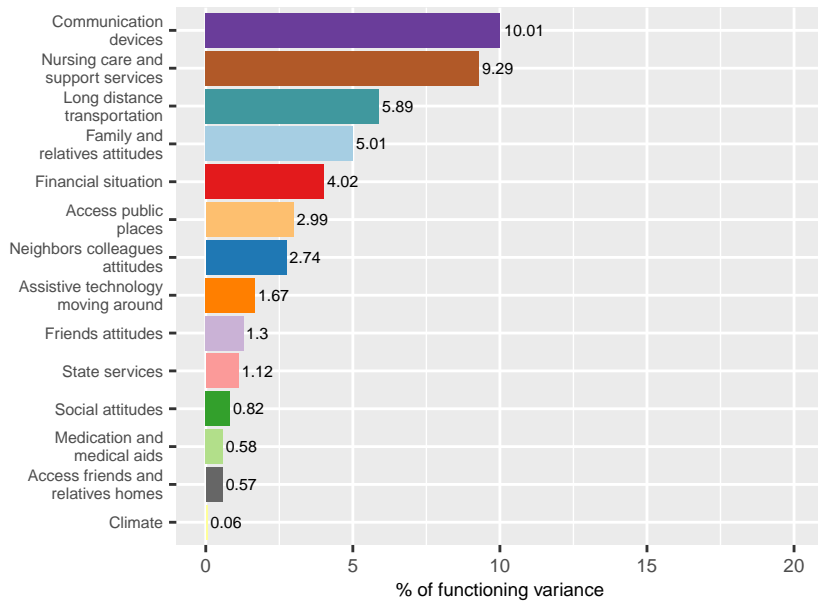

**Greece (N=176), R2=68.32%**

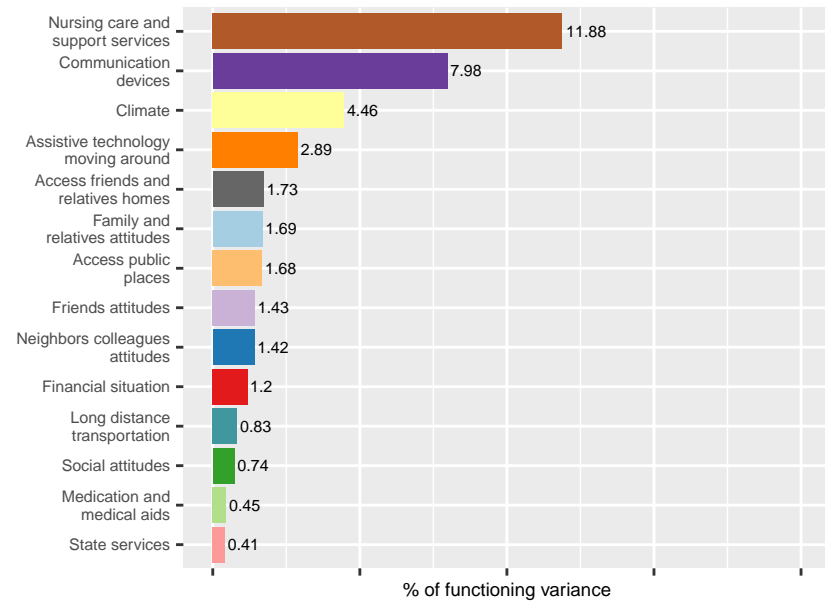

Supplement: pone.0284420.s003.pdf [file pone.0284420.s003.pdf]
