# Supplementary material for: Ageing, functioning patterns and their environmental determinants in the spinal cord injury (SCI) population: A comparative analysis across eleven European countries implementing the International Spinal Cord Injury Community Survey
Source: PubMed Central journal article supplement (PMC10118153; doi:10.1371/journal.pone.0284420), 2023-04-20
Supplement: pone.0284420.s009.pdf [file pone.0284420.s009.pdf]

#### S4 file. Posterior predictive p-value

Using estimated the model parameters, a new replicated data  $Y_{ij}^{rep}$ ,  $i = 1, \dots, n$ ,  $j = 1, \dots, J$  is calculated. The comparison of predictive distribution  $Y_{ij}^{rep}$  with the observed  $Y_{ij}$  is generally named as "posterior predictive check". Although the posterior predictive check involves a double-use of the data, an identification of a systematic difference may indicate a potential failing of the model. The posterior predictive distribution is calculated by MCMC as follows (1)(2):

- 1) for each iteration  $l=1, \dots, L$ ,  $L=5000$ , model parameters are estimated:  $\theta_i^l, \beta^l, \alpha^l$ ;
- 2) based on estimated parameters a replicated data  $Y^{(rep,l)}$  is calculated;
- 3) for the obtained replicated data, a summary statistic  $S(Y^{(rep,l)})$  is calculated,  $S(y)$ , here, the total number of respondents for each of the categories of each of the 25 items:

$$S_{jk}(y) = \sum_{i=1}^n I(y_{ij} = k)$$

where  $I(A)$  denotes the indicator function of its argument  $A$ . The posterior predictive p-value is calculates as:

$$P(S_{jk}(y^{rep}) \geq S_{jk}(y) | y)$$

A posterior predictive "p-value" of .5 means that  $S(y)$  will be exactly equal to the median of the posterior predictive distribution of  $S(y^{rep})$ . If our model's predictions are "biased" to be too high, then we will get a number greater than .5, and if they are generally on the low side, we will get a number less than .5.

#### References

- [1] Sinharay, S. Assessing fit of unidimensional item response theory models using a Bayesian approach. *Journal of Educational Measurement* 2005, 42(4), 375–394.
- [2] Sinharay, S, Johnson MS, Stern HS. Posterior predictive assessment of item response theory models. *Applied Psychological Measurement* 2006, 30(4), 298–321.
